# Supplementary material for: Long-Lasting Graft Union Compatibility Enigma Explained by Comparative Physiological and Biochemical Mechanisms in Di, Tri, and Tetraploid Watermelon (<em>Citrullus lanatus</em> L.) Grafted by Branches
Source: Preprints.org preprint supplement (doi:10.20944/preprints202012.0050.v1), 2020-12-02
Supplement: Supplementary file 1 [file supplementary]

**Supplementary Data**

**
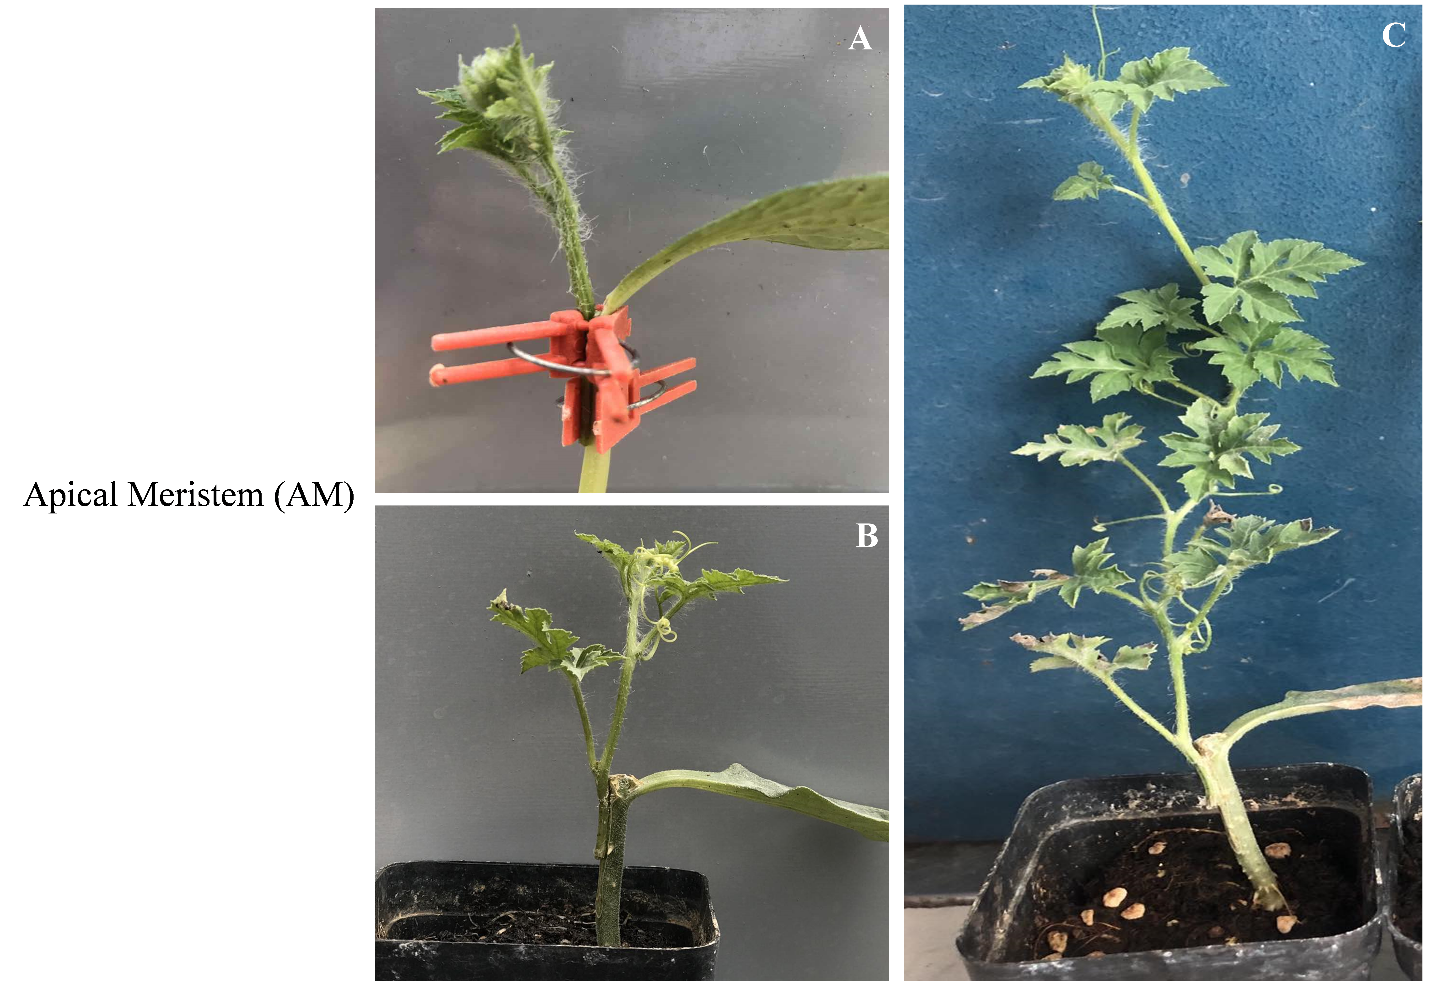
**

**(Figure S1)***. Effect of Scion/rootstocks combinations on the survival of polyploid watermelon grafting using (AM) as scion.* ***(A)****: at 0 DAG,* ***(B)*** *15 DAG, and* ***(C)****: 30 DAG,* ***DAG****: Days after Grafting.*

**
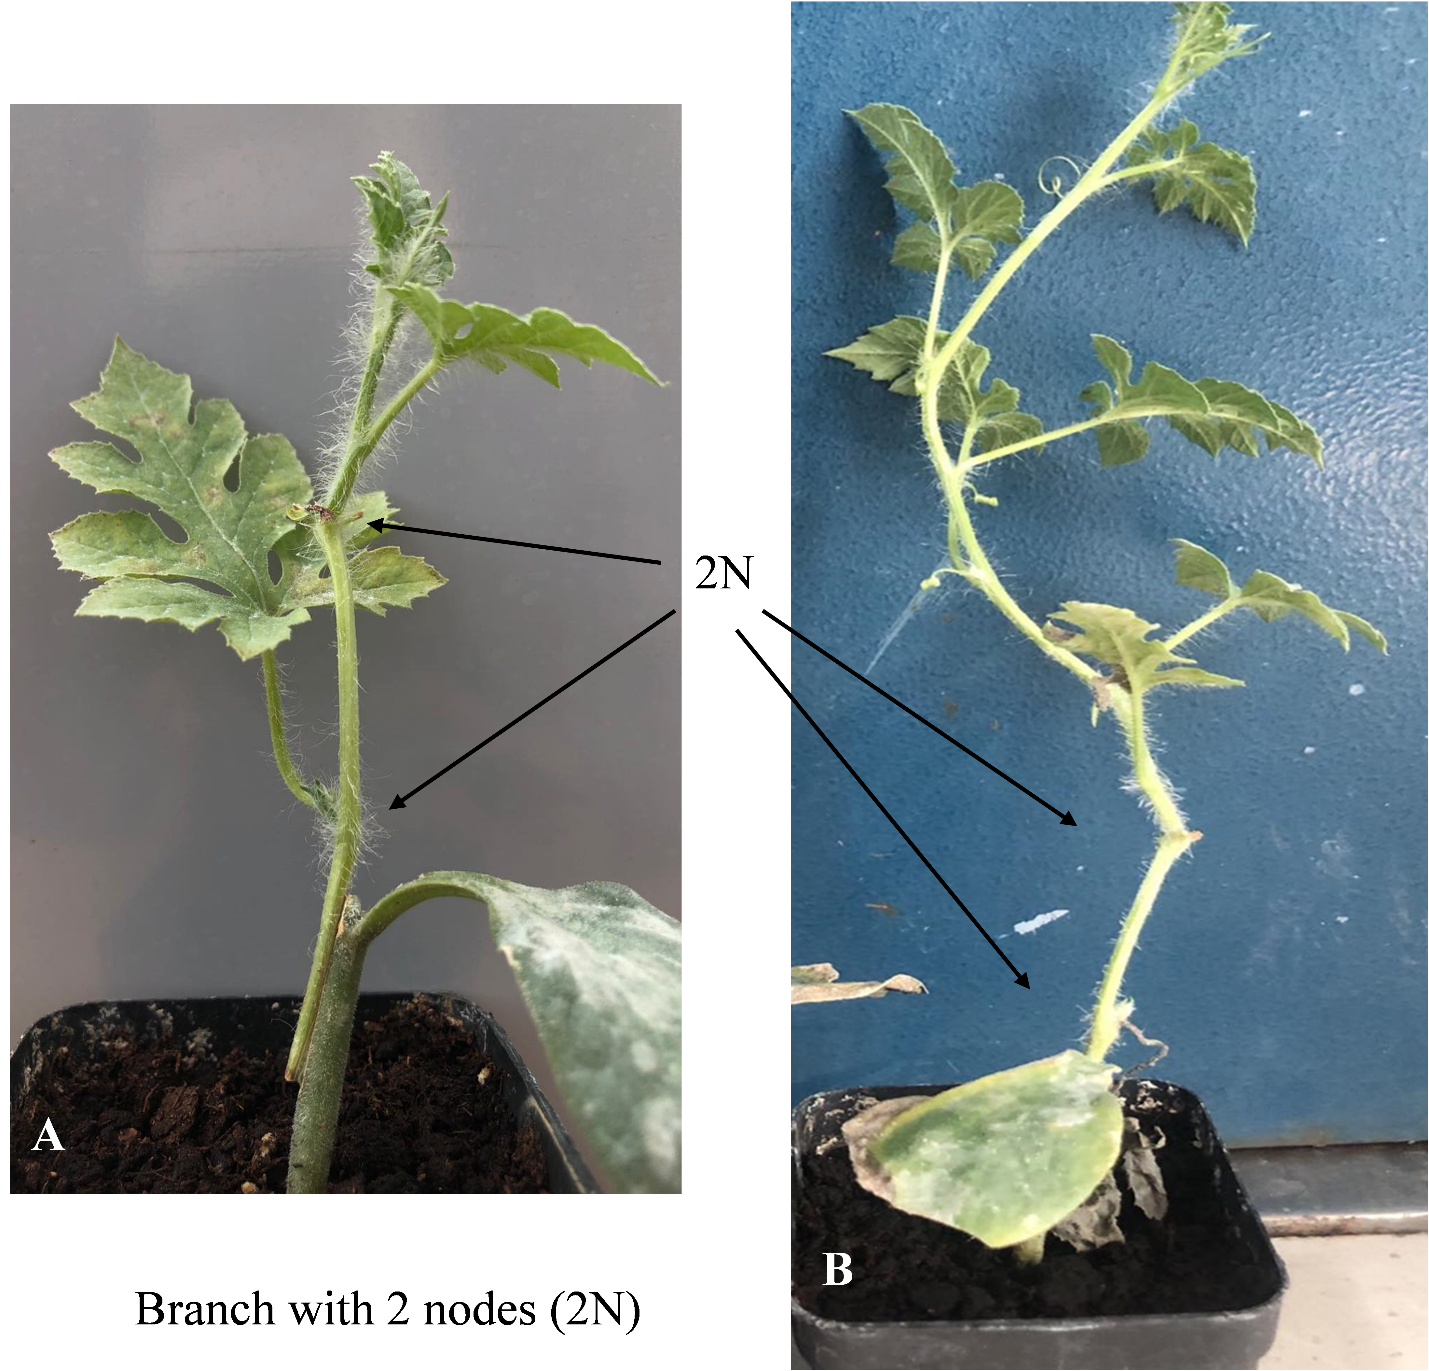
**

**(Figure S2)** *Effect of Scion/rootstocks combinations on the survival of polyploid watermelon grafting using (2N) as scion.* ***(A)****: at 15 DAG, and* ***(B)*** *30 DAG.*


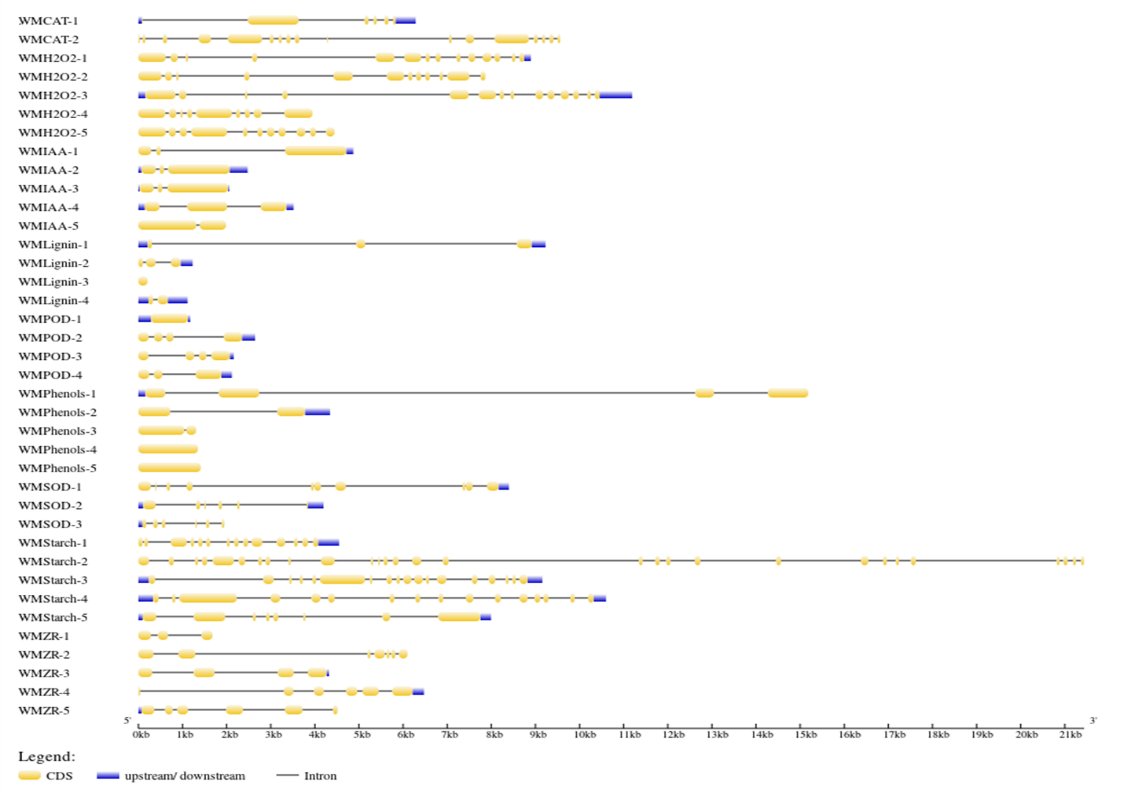


**(Figure S3)** *Structure of genes involved in graft compatibility during watermelon grafting process. Yellow boxes and black lines indicating exons and introns respectively, while blue boxes at the both end of each gene indicates untranslated regions (UTRs).*

**
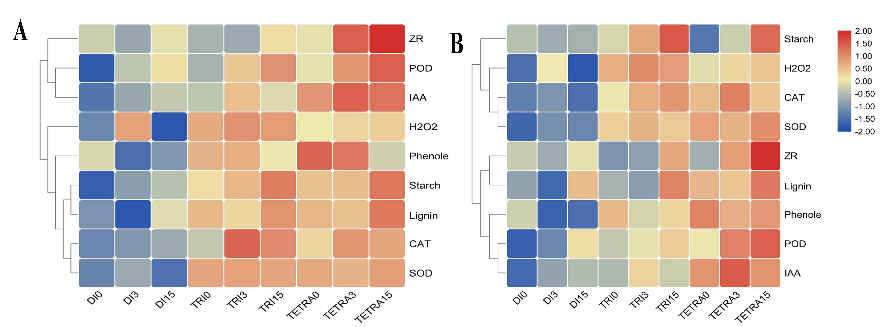
**

*Figure S4. Heat map representing the contents of hormones, starch, antioxidants and biochemicals in the grafting union at 0, 3 and 15 days after grafting.*] ***Di****: Diploid,* ***Tri****: triploid,* ***Tetra****: Tetraploid.*

**Table S1:** Genes linked to graft compatibility having high homology with other genes selected from different plant species.

|  |  | **High homology** |
| --- | --- | --- |
| WMCAT | WMCAT-1 | CMCAT_*Cucurbita moschata*  CMCAT_*Cucurbita_maxima* |
| WMCAT-2 | CPCAT_*Cucurbita pepo*. |
| WMPOD | WMPOD-1 | CSPOD_*Cucumis sativus3*  CMPOD_*Cucumis melo3*. |
| WMPOD-2 | CMPOD_*Cucumis melo*2  CSPOD_*Cucumis sativus*2 |
| WMPOD-3 | CMPOD_*Cucumis melo*  CSPOD_*Cucumis sativus* |
| WMPOD-4 | CMPOD_*Cucumis melo*4 and CSPOD_*Cucumis sativus*4 |
| WMIAA | WMIAA-1 | CSIAA_*Cucumis sativus3* andCMIAA_*Cucumis melo3* |
| WMIAA-2 | CSIAA_*Cucumis sativus*2 and CMIAA_*Cucumis melo*2 |
| WMIAA-3 | CSIAA_*Cucumis sativus* and CMIAA_*Cucumis melo* |
| WMIAA-4 | CMIAA_*Cucumis melo*4 and CSIAA_*Cucumis sativus*4 |
| WMIAA-5 | CMIAA_*Cucumis melo*5 and CSIAA_*Cucumis sativus*5 |
| WMZR | WMZR-1 | CSZR_*Cucumis sativus2*, CSZR_*Cucumis sativus*3 CMZR_*Cucumis melo*2,and CMZR_*Cucumis melo*3 |
| WMZR-2 | - |
| WMZR-3 | CSZR_*Cucumis sativus*5 and CMZR_*Cucumis melo*5 |
| WMZR-4 | CMZR_*Cucumis melo*4 and CSZR_*Cucumis sativus*4 |
| WMZR-5 | CMZR_*Cucumis melo* and CSZR_*Cucumis sativus* |
| WMPhenols | WMPhenols-1 | CSPhenols_*Cucumis sativus5* and CMPhenols_*Cucumis melo5* |
| WMPhenols-2 | CSPhenols_*Cucumis sativus*3 and CMPhenols_*Cucumis melo*3 |
| WMPhenols-3 | CMPhenols_*Cucumis melo,* and CSPhenols_*Cucumis sativus*. |
| WMPhenols-4 | - |
| WMPhenols-5 | CMPhenols_*Cucumis melo*2, CMPhenols_*Cucumis melo*4  CSPhenols_*Cucumis sativus*2, CSPhenols_*Cucumis sativus*4. |
| WMLignin | WMLignin-1 | CSLignin_*Cucumis sativus* and CMLignin_*Cucumis melo* |
| WMLignin-2 | CMLignin_*Cucumis melo*4, CSLignin_*Cucumis sativus*4, and CSLignin_*Cucumis sativus*5. |
| WMLignin-3 | - |
| WMLignin-4 | CMLignin_*Cucumis melo*1, CMLignin_*Cucumis melo*3, CSLignin_*Cucumis sativus*1, and CSLignin_*Cucumis sativus3*. |
| WMStarch | WMStarch-1 | CSStarch_*Cucumis sativus4*. |
| WMStarch-2 | CMStarch_*Cucumis melo*2 |
| WMStarch-3 | CMStarch_*Cucumis melo4*, and CSStarch_*Cucumis sativus3*. |
| WMStarch-4 | CMStarch_*Cucumis melo3*, and CSStarch_*Cucumis sativus2*. |
| WMStarch-5 | CMStarch_*Cucumis melo5*, and CSStarch_*Cucumis sativus5* |
| WMH2O2 | WMH2O2-1 | CSH2O2_*Cucumis sativus5* and CMH2O2_*Cucumis melo*4 |
| WMH2O2-2 | CSH2O2_*Cucumis sativus2*. |
| WMH2O2-3 | CSH2O2_*Cucumis sativus5* and CMH2O2_*Cucumis melo*4 |
| WMH2O2-4 | CCH2O2_*Citrullus colocynthis*. |
| WMH2O2-5 | CSH2O2_*Cucumis sativus6*, and CSH2O2_*Cucumis sativus7*. |
| WMSOD | WMSOD-1, | CSSOD_*Cucumis sativus2,* CMSOD_*Cucumis melo*, and CMSOD_*Cucumis melo*2. |
| WMSOD-2 | CSSOD_*Cucumis sativus3*. |
| WMSOD-3 | CSSOD_*Cucumis sativus* |

**Table *S2*:** *Primers used for qRT-PCR in this study.*

| ID | primer |
| --- | --- |
| Actin-F | GTACGACAACGGGCCTTAAA |
| Actin-R | ATGGGCTTGACAGGTTGTTC |
|  |  |
| WMCAT-1-F | CTAATGTGTTGAGCGGCAAA |
| WMCAT-1-R | GTCTTACGAACCGCTCTTGC |
| WMCAT-2-F | CGGCATTACTAAAGCGGAAG |
| WMCAT-2-R | TAGTCCAGAAGGGGGTGTTG |
|  |  |
| WMPOD-1-F | TTGGATGCCTACACGATCAA |
| WMPOD-1-R | GTATTGGCCAGCTTCACCAT |
| WMPOD-2-F | CATTGGGAAGGAAGGACTCA |
| WMPOD-2-R | CAATGTCAAGCCCTTGGTTT |
| WMPOD-3-F | GCTCTTTCAGGAAGCCACAC |
| WMPOD-3-R | GGTAGGGCTCACAAAGTCCA |
| WMPOD-4-F | TGGCTGTGATGCTTCTATGC |
| WMPOD-4-R | CTGCACAAGAGACGATTCCA |
|  |  |
| WMSOD-1-F | TTTCTAAGGTCCACCGCAAC |
| WMSOD-1-R | GGGAATTGGGTTTGAAGGAT |
| WMSOD-2-F | CAAGAAGACGATGGAGCACA |
| WMSOD-2-R | TCCATCAGCATTGGCAATTA |
| WMSOD-3-F | CCATCCAGTTCGTCCAAGAT |
| WMSOD-3-R | CCTCCATGGTCCTTCTTCAA |
|  |  |
| WMH2O2-1-F | GGGTTACTTCGGACCAGACA |
| WMH2O2-1-R | GAAACCCGTCAGCCTATCAA |
| WMH2O2-2-F | ATGACCAAAAACGTCGGAAG |
| WMH2O2-2-R | ACTCGCTCGACTCGTTCATT |
| WMH2O2-3-F | AACTTCTGCTTCGACCTCCA |
| WMH2O2-3-R | AACTCGTGCGAGAAATGCTT |
| WMH2O2-4-F | AGCCAACAAACGAAACCAAC |
| WMH2O2-4-R | TCTGTGGCGATATTGGATGA |
| WMH2O2-5-F | CAGTCCAGGTTCCATTCGTT |
| WMH2O2-5-R | TTCTCAACGCGAACTCCTTT |
|  |  |
| WMIAA-1-F | AATGTCGAGTGGCCGATAAC |
| WMIAA-1-R | GCACCGTGGTGCCTTATACT |
| WMIAA-2-F | TTCCCACGCTGGAATTTTAC |
| WMIAA-2-R | GGGAGGAATTCGAAGTAGCC |
| WMIAA-3-F | ACCTCTATGTGCCTGGGTTG |
| WMIAA-3-R | GGCAAAGAATGGCCTCATTA |
| WMIAA-4-F | GGTGAATTTGAAGCCGATGT |
| WMIAA-4-R | CAAGCTCCTTTTGCAACTCC |
| WMIAA-5-F | AACAATTCCAGGCCACTACG |
| WMIAA-5-R | CCCTGTCGGTATACGCTGTT |
|  |  |
| WMZR-1-F | GACCGCCTATTGCCTCATTA |
| WMZR-1-R | TTCCCACACACATTGCTGTT |
| WMZR-2-F | CGCATTATCCCAGCTCTCAT |
| WMZR-2-R | TAGCGAGACTGAGCGAGACA |
| WMZR-3-F | GTTAGCGAGGGGAGCTTTCT |
| WMZR-3-R | AGCACTCTTTTTGGCGTTGT |
| WMZR-4-F | GTGTCGTGGACATGTTGGAG |
| WMZR-4-R | GCTAGAGCCAAATGCTGTCC |
| WMZR-5-F | GTTACGCGGGGTATATGGTG |
| WMZR-5-R | GCTGCTTTCAAACTCGGTTC |
|  |  |
| WMLignin-1-F | CCTTTATGGGGGAATCCTGT |
| WMLignin-1-R | GTGAACAAAAACGGGTTGCT |
| WMLignin-2-F | ACTCGTTGCCTTTGTCTCGT |
| WMLignin-2-R | GAAACTGCAACTCGTGCAAA |
| WMLignin-3-F | TATGGAAAAGGATGGGTGGA |
| WMLignin-3-R | CTTTAACGTGGCTCGTCCTC |
| WMLignin-4-F | GAGTCGGAGGTTTGGTGTGT |
| WMLignin-4-R | CCGACCAAGAGATGAGAAGG |
|  |  |
| WMPhenols-1-F | GGCTCATAAATCCCCCATTT |
| WMPhenols-1-R | TGCAGGTTGTTGTCCAGTGT |
| WMPhenols-2-F | CTCACTATGTCGCCGGATTT |
| WMPhenols-2-R | ACCGTGAAGGTGGAGAGATG |
| WMPhenols-3-F | AAGGTGCCTGCTTCACCTAA |
| WMPhenols-3-R | TATTTCCCCAACCAAACCAA |
| WMPhenols-4-F | CGATTGAGCAACAAAAAGCA |
| WMPhenols-4-R | CTGTAGGAGGGCTCACGAAC |
| WMPhenols-5-F | CCCGATACTCATCGTTCGTT |
| WMPhenols-5-R | GGCGTAGAAACCCAGGTACA |
|  |  |
| WMStarch-1-F | TGATTGGCACACAGCTCTTC |
| WMStarch-1-R | AATTGATCGGGCAGATTCAG |
| WMStarch-2-F | GCAAAATTTTCCCGAGATGA |
| WMStarch-2-R | TTTTATTCTCGCACGCCTCT |
| WMStarch-3-F | GCTCTGGCTTTGGTTCTTTG |
| WMStarch-3-R | GTCGCATTTTACACGAAGCA |
| WMStarch-4-F | TTTGATCATGGGAGCATTCA |
| WMStarch-4-R | GCCTCTTTGGGAACATGAAA |
| WMStarch-5-F | AAAGGACGGACAACCAAGTG |
| WMStarch-5-R | GCCAGCTACGTCTCCAAGTC |


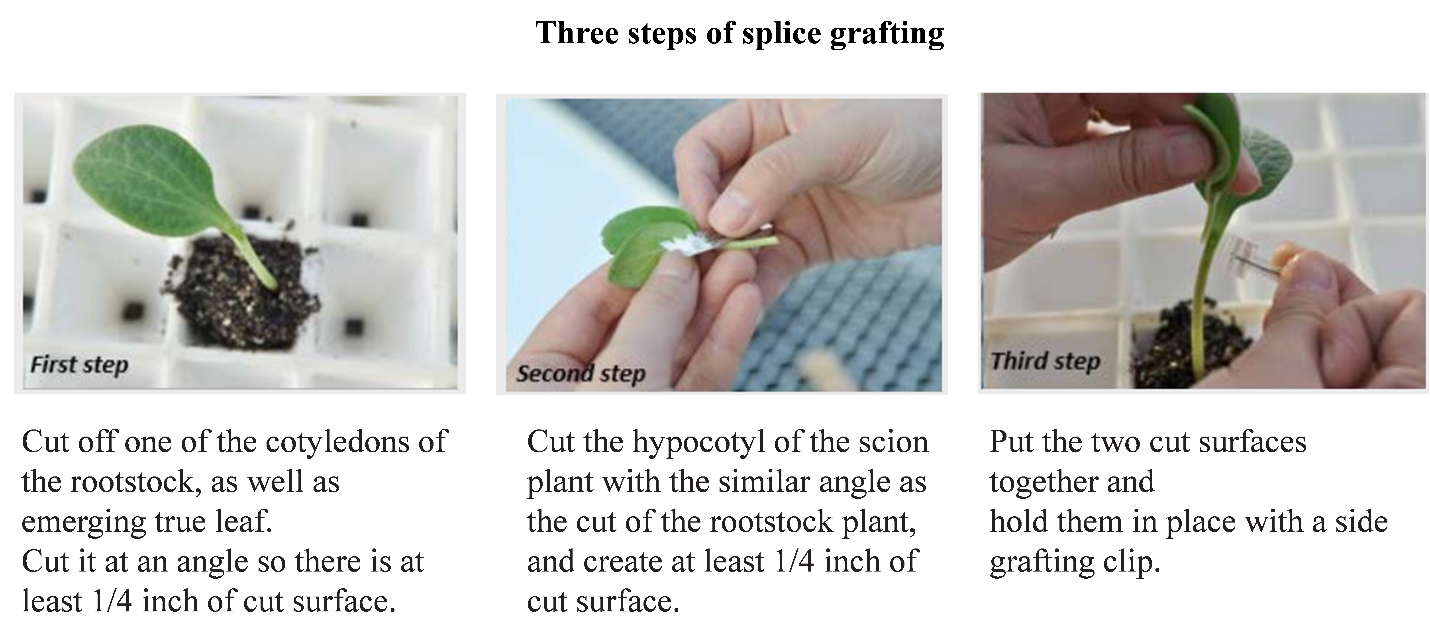


**(Figure S5) Splice grafting method steps in polyploid watermelon plants**
